# Supplementary material for: Metformin, Empagliflozin, and Their Combination Modulate Ex-Vivo Macrophage Inflammatory Gene Expression
Source: MDPI journal article supplement (doi:10.3390/ijms24054785), 2023-03-01
Supplement: s1 [file s1]

**Table S1.** RT-qPCR Primers.

| <b>Gene</b>        | <b>Forward Sequence 5'</b>   | <b>Reverse Sequence 3'</b> |
|--------------------|------------------------------|----------------------------|
| <i>Cyclophilin</i> | GGCCGATGACGAGCCC             | TGTCTTTGGAACTTTGTCTGCAA    |
| <i>Tnfa</i>        | CCAGACCCTCACACTCAGATC        | CACTTGGTGGTTTGCTACGAC      |
| <i>Il1b</i>        | TGGGCCTCAAAGGAAAGAAT         | CAGGCTTGTGCTCTGCTTGT       |
| <i>Ifng</i>        | TCAAGTGGCATAGATGTGGAAGA<br>A | TGGCTCTGCAGGATTTTCATG      |
| <i>Il6</i>         | CTGCAAGAGACTTCCATCCAGTT      | GAAGTAGGGAAGGCCGTGG        |
| <i>Tlr2</i>        | CGAATTGCATCACCGGTCAG         | CCTCTGAGATTTGACGCTTTGT     |
| <i>Clec7a</i>      | CAGAGTGAAGGGCCATGGTT         | ACTTGAAACGAGTTGGGGAAGA     |
